# Supplementary material for: Comparative analysis of single-stranded DNA donors to generate conditional null mouse alleles
Source: PubMed Central journal article supplement (PMC6011517; doi:10.1186/s12915-018-0529-0), 2018-06-21

Figure S2

A.

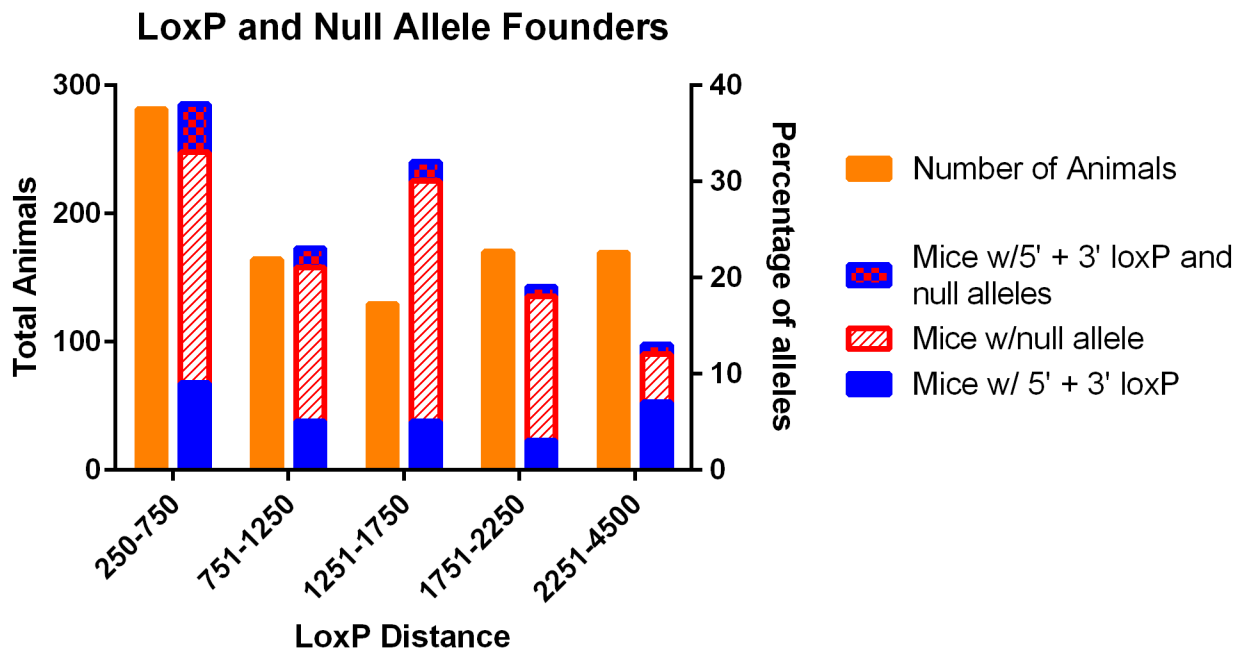

B.

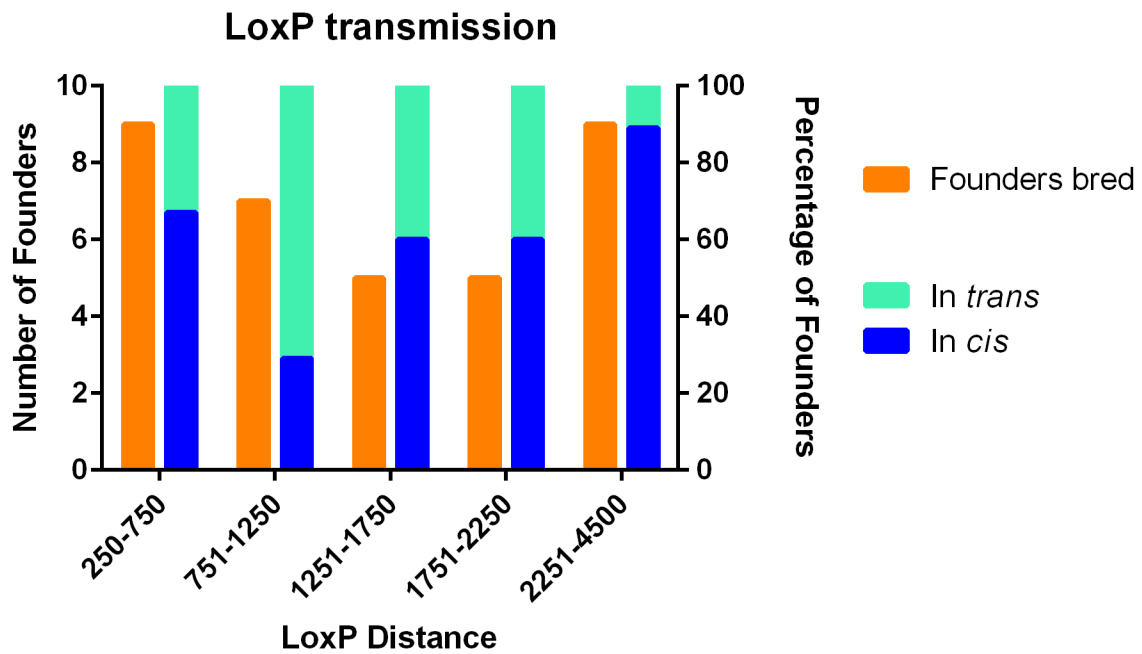

Supplement: 12915_2018_529_MOESM2_ESM.pdf [file 12915_2018_529_MOESM2_ESM.pdf]
