# Supplementary material for: Comparative analysis of single-stranded DNA donors to generate conditional null mouse alleles
Source: PubMed Central journal article supplement (PMC6011517; doi:10.1186/s12915-018-0529-0), 2018-06-21
Supplement: 12915_2018_529_MOESM3_ESM.pdf [file 12915_2018_529_MOESM3_ESM.pdf]

## Figure S3

### A. 5' loxP Site in *Mbd2* putative founder:

ssODN donor sequence

sgRNA

BamHI

loxP

sgRNA

AGTTCTCAGCAGTGAGCTGTGTGTGCAGTAGCAGCATGCGCAGCACGGATCCATAACTTCGTATAGCATAACATTATACGAAGTTATTTTCGGTGTAAAG

AGTTCTCAGCAGTGAGCTGTGTGTGCAGTA-----GCATACATTATACGAAGTTATTTTCGGTGTAAAG

Genomic loxP site sequence

### B. 5' loxP Site in *Il1r1* putative founders:

ssODN donor sequence

sgRNA

BamHI

loxP

sgRNA

CATTAGAACAATGAGTAATTGCTCGATGCAGTAATTGCTCGATGCGGATCCATAACTTCGTATAGCATAACATTATACGAAGTTATTCCTCTGGGATTAAG

CATTAGAACAATGAGTAATTGCTCGATGCAGTAATTGCTCGATGCGGATCCATAACTTCATATAGCATAACATTATACGAAGTTATTCCTCTGGGATTAAG

CATTAGAACAATGAGTAATTGCTCGATGCAGTAATTGCTCGATGCGGATCCATAACTTCGTATA-C-TACATTATACGAAGTTATTCCTCTGGGATTAAG

CATTAGAACAATGAGTAATTGCTCGATGCAGTAATTGCTCGATGCGGA-CCATAACTTCGTATAGCATAACATTATACGAAGTTATTCCTCTGGGATTAAG

Genomic loxP site sequences: 3 different founders
