# Supplementary material for: Comparative analysis of single-stranded DNA donors to generate conditional null mouse alleles
Source: PubMed Central journal article supplement (PMC6011517; doi:10.1186/s12915-018-0529-0), 2018-06-21
Supplement: 12915_2018_529_MOESM6_ESM.pdf [file 12915_2018_529_MOESM6_ESM.pdf]

Tables S3-5. Fisher's Exact Test calculations for LoxP transmission differences by homology arm design

Table S3. 2 loxP site founder

---

|            | founder | no founder | total |
|------------|---------|------------|-------|
| Symmetric  | 15      | 7          | 22    |
| Asymmetric | 8       | 2          | 10    |

---

p = 0.68

---

Table S4. LoxP in cis

---

|            | cis | trans | total |
|------------|-----|-------|-------|
| Symmetric  | 14  | 1     | 15    |
| Asymmetric | 4   | 3     | 7     |

---

p = 0.07

---

Table S5. LoxP in cis, not mutated

---

|            | non-mutated | mutated | total |
|------------|-------------|---------|-------|
| Symmetric  | 10          | 4       | 14    |
| Asymmetric | 4           | 0       | 4     |

---

p = 0.52

---
